# Supplementary material for: A Superior Two-Dimensional Phosphorus Flame Retardant: Few-Layer Black Phosphorus
Source: MDPI journal article supplement (doi:10.3390/molecules28135062), 2023-06-28
Supplement: s1 [file s1]

## Supporting Information

### A Superior two-dimensional phosphorus flame retardant: few-layer black phosphorus

Taiming Zhang, Huanyu Xie, Shuai Xie, Ajuan Hu, Jie Liu, Jian Kang, Jie Hou, Qing Hao, Hong Liu, Hengxing Ji\*

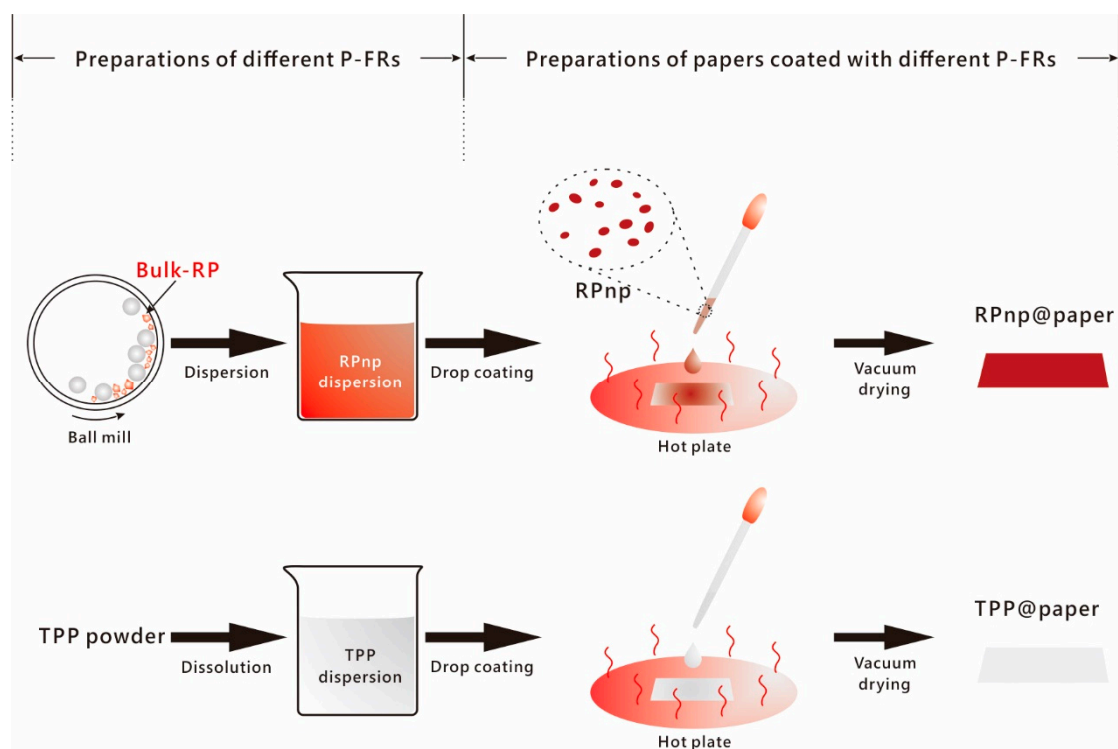

**Figure S1.** The schematic of preparation of different P-FRs and the papers with different P-FRs.

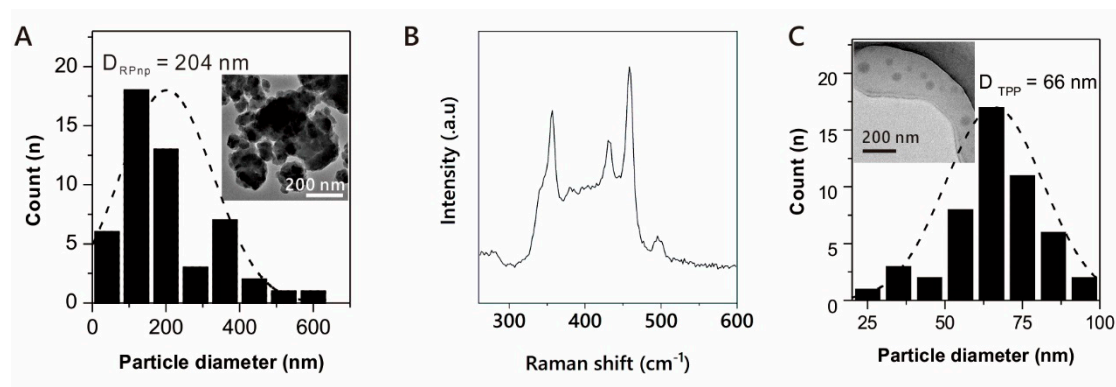

**Figure S2.** (A) The distribution of lateral size of RPnp from analysis of TEM images. Inset in (A) is the lower magnification TEM image of RPnp. (B) Raman spectrum of the RPnp. The Raman peaks between 200 and  $500\text{ cm}^{-1}$  were characteristic peaks of RP. (C) The distribution of lateral size of re-precipitated TPP nanoparticles from analysis of TEM images. Inset in (C) is the lower magnification TEM image of re-precipitated TPP nanoparticles.

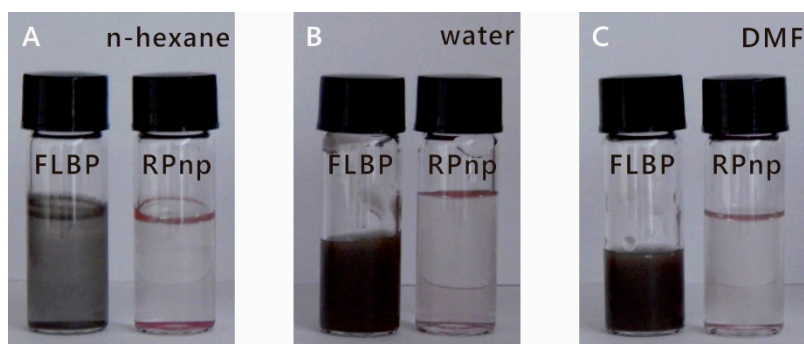

**Figure S3.** The photo of FLBP and RPnp dispersing in n-hexane (A), water (B) and DMF (C) after two hours of sonication with a same concentration ( $0.5\text{ mg ml}^{-1}$ ). N-hexane (relative polarity: 0.09), water (relative polarity: 1) and DMF (relative polarity: 0.386) were dispersants.

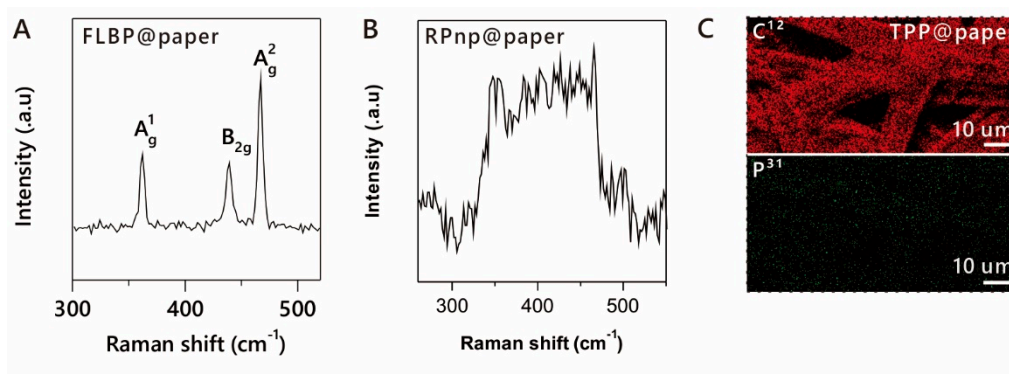

**Figure S4.** (A) Raman spectrum of FLBP@paper. (B) Raman spectrum of RPnp@paper. (C) Energy-dispersive X-ray spectroscopy (EDS) mapping of TPP@paper.

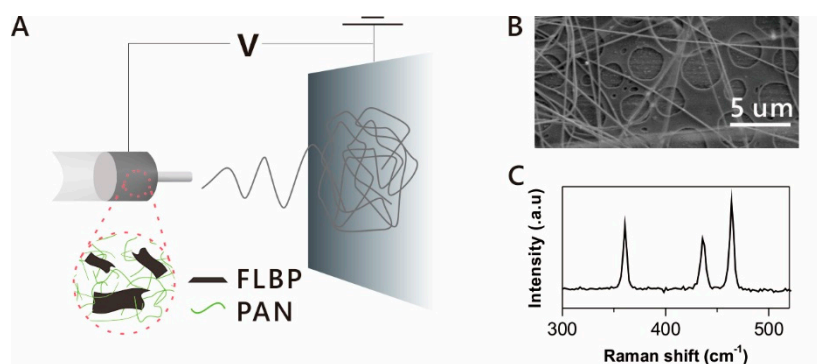

**Figure S5.** (A) Schematic diagram of FLBP@PAN fabrication. (B) SEM image of FLBP@PAN. (C) Raman spectrum of FLBP@PAN, acquired from the area of bright spots in (B).

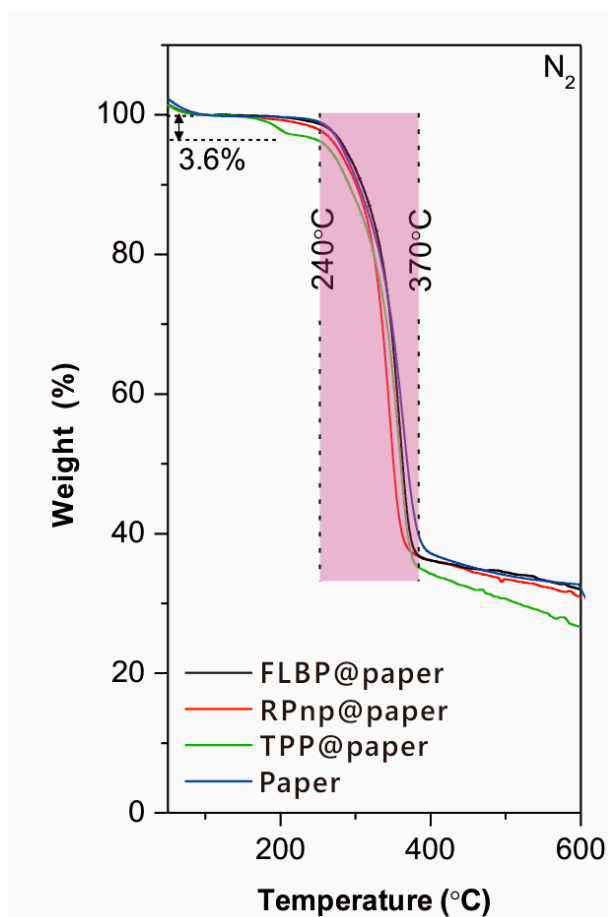

**Figure S6.** TGA curves of the papers coated with different P-FRs under N<sub>2</sub>. The weights at 105°C were normalized to avoid the disturbance from absorbed water, and the main decomposition process was marked with mauve. The weight loss rate of TPP@paper around 180°C attributed to volatilization of TPP was noted.

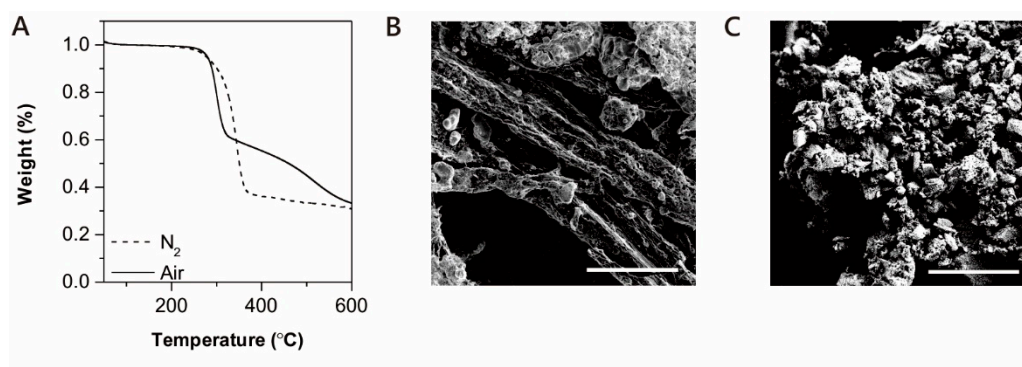

**Figure S7.** (A) TGA curves of FLBP@paper in air or N<sub>2</sub>. (B) SEM image of FLBP@paper after TGA test in air. The fibrous units of cellulose were partly reserved. (C) SEM image of FLBP@paper after TGA test in N<sub>2</sub>. The fibrous units of cellulose were destroyed. Indicating phosphorus oxide was the catalyst for char formation.

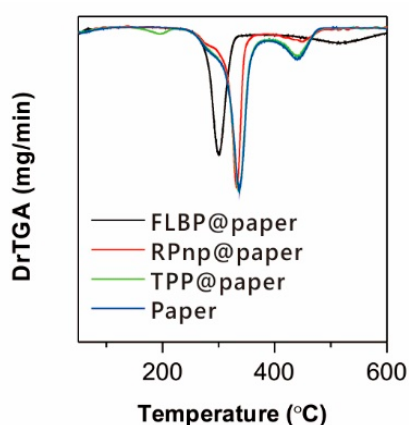

**Figure S8.** DTG curves of the papers with different P-FRs under air. The peak of weight loss of FLBP@paper was at ~300°C, and the weight-loss rate of FLBP@paper was lower than that of the others during 350 ~ 470°C.

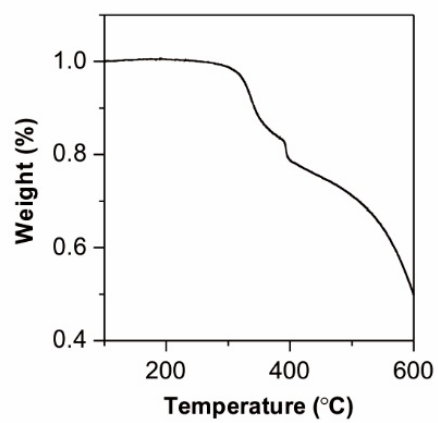

**Figure S9.** TGA curve of PAN fibers in air.

**Table S1.** BP-base flame retardants in flammable polymers

| <b>Flame retardants</b> | <b>Polymers</b>         | <b>Additive amount</b> | <b>Flame-retardant efficiency</b>                                                                                                                                  | <b>References</b>                                                  |
|-------------------------|-------------------------|------------------------|--------------------------------------------------------------------------------------------------------------------------------------------------------------------|--------------------------------------------------------------------|
| Black phosphorene       | waterborne polyurethane | 0.2 wt %               | limiting oxygen index increased by 2.6%; heat flow decreased by 34.7%; peak heat release rate decreased by 10.3%                                                   | Polymers 2018, 10 (3), 227 [29]                                    |
| BP-EC-Exf               | polyurethane acrylate   | 0.1 wt %               | tensile strength increased by 59.8%; tensile fracture strain increased by 88.1%; peak heat release rate reduced by 44.5%; total heat release decreased by 34.5%    | ACS Applied Materials & Interfaces 2019, 11 (14), 13652-13664 [36] |
| BP-PZN                  | Epoxy Resin             | 2 wt%                  | 59.4% decrease in peak heat release rate; 63.6% reduction in total heat release                                                                                    | Small 2019, 15 (10), 1805175 [30]                                  |
| BP/G                    | waterborne polyurethane | 3.55%                  | improves residues in TG analysis (5.64%) and cone calorimeter test (12.50%); a lower peak release rate and total heat release, which decrease by 48.18% and 38.63% | Polymers 2019, 11 (2), 193 [37]                                    |
| BP@MF                   | epoxy resin             | 1.2 wt%                | char yield increased by 70.9%; limiting oxygen index increases by 25.9%; peak of heat release rate reduced by 43.3%; fire growth rate decreases by 41.2%           | Chemical Engineering Journal 2020, 382, 122991 [31]                |
| BP-MCNTs                | epoxy resin             | 2 wt%                  | peak of heat release rate and total heat release reduced by 55.81% and 41.17%; FGI decreased by 10.38                                                              | Journal of Hazardous Materials 2020, 383, 121069 [32]              |
| BP-NH-TOF               | epoxy resin             | 2 wt%                  | a decrease in PHRR (61.2%) and THR (44.3%); improved LOI (29.0%) and UL-94 (V-0)                                                                                   | Chemical Engineering Journal 2020, 402, 126212 [34]                |
| TA-BP                   | polyurethane            | 2.0 wt%                | peak value of heat release rate (−56.5 %), total heat release (−43.0 %), CO <sub>2</sub> concentration (−57.3 %)                                                   | Journal of Hazardous Materials 2020, 387, 121971 [38]              |

|                    |                                                   |         |                                                                                                                                                                                        |                                                                 |
|--------------------|---------------------------------------------------|---------|----------------------------------------------------------------------------------------------------------------------------------------------------------------------------------------|-----------------------------------------------------------------|
| BP/BN              | Waterborne Polyurethane                           | 0.4 wt% | limiting oxygen index to 33.8%; Peak heat release rate and total heat release reduced by 50.94% and 23.92%                                                                             | Polymers 2020, 12 (7), 1487 [39]                                |
| BP-CTAB            | Polylactic acid                                   | 2 wt%   | peak heat release rate decreases by 38.8%; the time to peak heat release rate postponed from 157 to 200 s; better than red phosphorus                                                  | Polymer Degradation and Stability 2020, 178, 109194 [40]        |
| IL-BP              | polyurethane                                      | 2 wt%   | decreases of 38.2% and 19.7% in peak values of heat release rate and total heat release; the maximum concentration of CO <sub>2</sub> and highly toxic CO decreased by 36.9% and 26.5% | Journal of Colloid and Interface Science 2020, 561, 32-45 [41]  |
| BP nanosheets      | nanosheets                                        | 24 wt%  | 26.8% reduction in pHRR; 23.2% reduction in THR; 5% increment in the LOI value                                                                                                         | Journal of Materials Chemistry A 2020, 8 (28), 14126-14134 [42] |
| BPs                | Glass fiber reinforced polyethylene terephthalate | 2.7 wt% | PHRR and THR rate decreases ca. 52.5% and 34.8%; better than red phosphorus                                                                                                            | Polymers for Advanced Technologies 2021, 32 (9), 3515-3522 [35] |
| BP-NH <sub>2</sub> | graphene oxide                                    | 20 wt % | heat release rate value a 96.57% decrease                                                                                                                                              | Chemistry of Materials 2021, 33 (9), 3228-3240 [43]             |
| BP nanosheets      | epoxy resin                                       | 1.0 wt% | heat release peak rate by 34.4%; total heat release by 27.0%, peak of smoke production rate by 69.2%; total production of carbon monoxide by 50.8%                                     | Nanoscale 2022, 14 (7), 2599-2604 [33]                          |
